# Supplementary material for: Association of Hearing Loss With Dementia
Source: PubMed Central journal article supplement (PMC6669778; doi:10.1001/jamanetworkopen.2019.8112), 2019-07-31
Supplement: jamanetwopen-2-e198112-s001.pdf [file jamanetwopen-2-e198112-s001.pdf]

## Supplementary Online Content

Liu C-M, Lee CT-C. Association of hearing loss with dementia. *JAMA Netw Open*. 2019;2(7):e198112. doi:10.1001/jamanetworkopen.2019.8112

**eFigure 1.** Flowchart of Database Assembly and Cohort Study Cases Selection

**eFigure 2.** Age Distribution in Non-Hearing Loss and Hearing Loss Groups

**eTable.** Effect of Hearing Loss on Dementia in Taiwan by Sex and Age Groups, Cohort Study, 2000 to 2011

This supplementary material has been provided by the authors to give readers additional information about their work.

**eFigure 1. Flowchart of Database Assembly and Cohort Study Cases Selection**

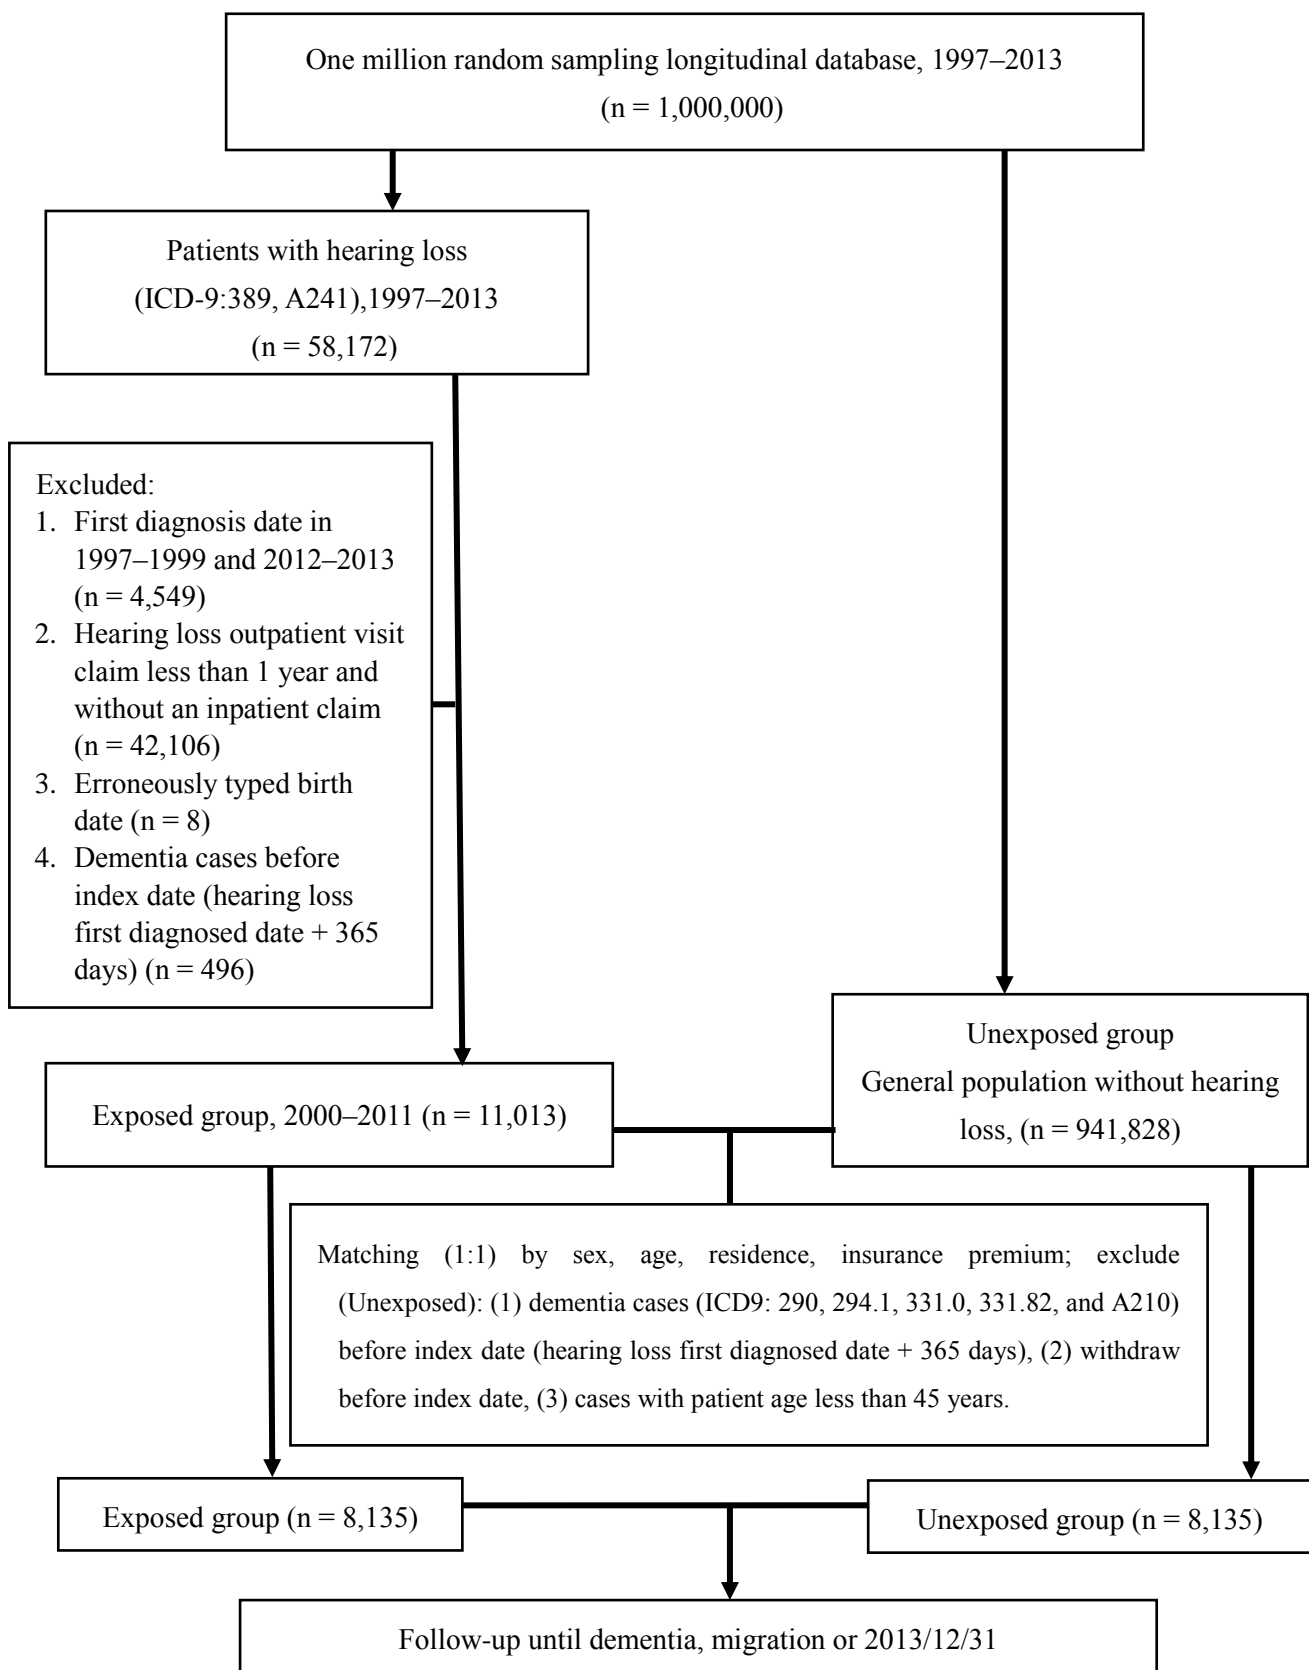

**eFigure 2. Age Distribution in Non-Hearing Loss and Hearing Loss Groups**

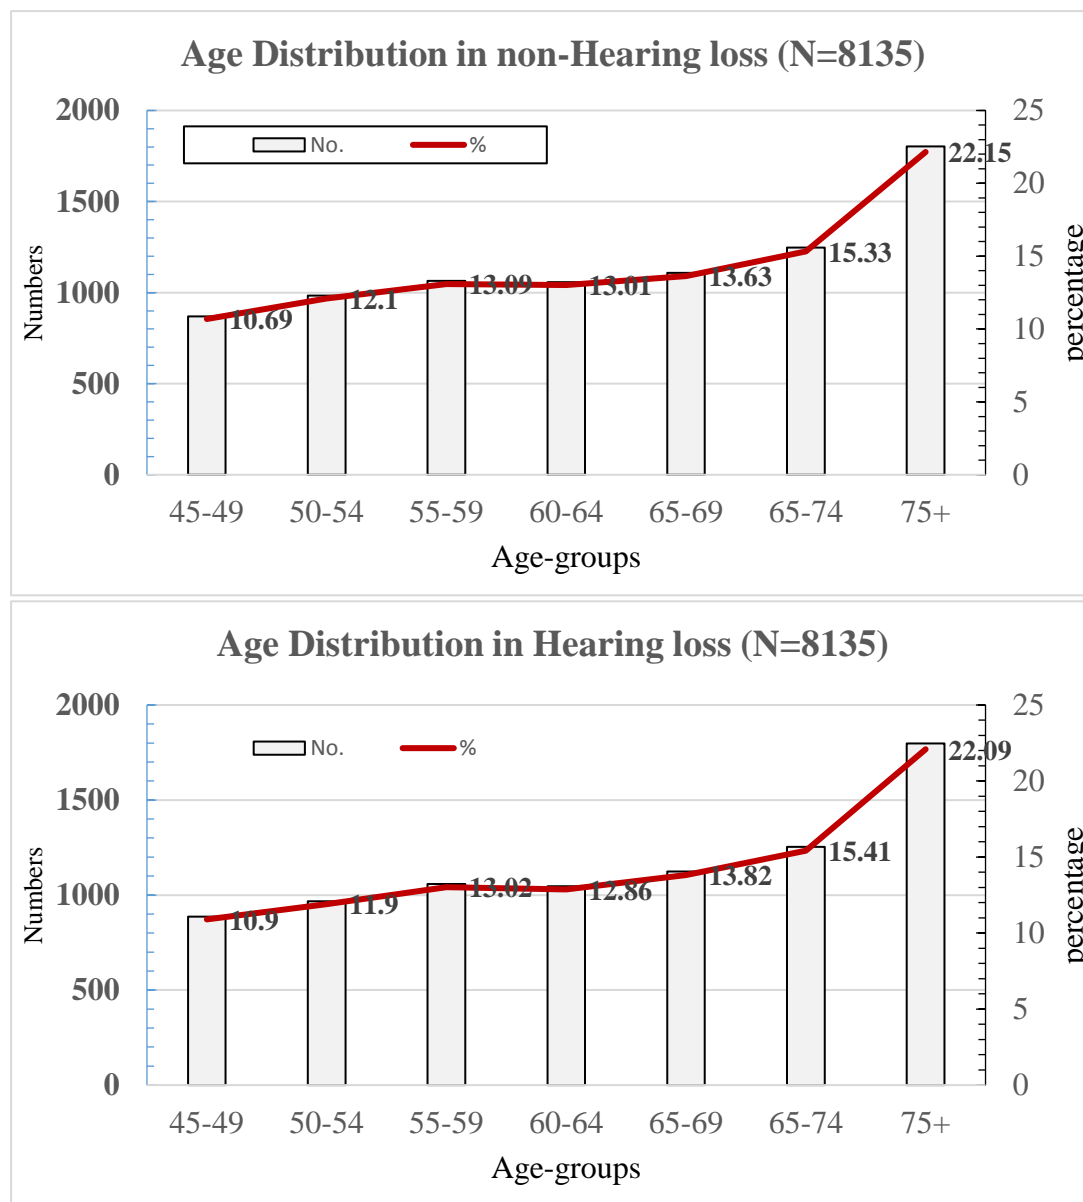

**eTable. Effect of Hearing Loss on Dementia in Taiwan by Sex and Age Groups, Cohort Study, 2000 to 2011**

| Subgroup analysis | Exact matching                               |                     |                                |          |          | Propensity score matching      |          |          |
|-------------------|----------------------------------------------|---------------------|--------------------------------|----------|----------|--------------------------------|----------|----------|
|                   | Incidence rate (95% CI) (1,000 person-years) |                     | Adjusted <sup>a</sup> analysis |          | FDR,     | Adjusted <sup>a</sup> analysis |          | FDR,     |
|                   | HL                                           | non-HL              | HR (95% CI)                    | <i>P</i> | <i>P</i> | HR (95% CI)                    | <i>P</i> | <i>P</i> |
| Total             | 19.38<br>(18.25-20.57)                       | 13.98(13.01-15.00)  | 1.17 (1.07 - 1.29)             | 0.001    | 0.003    | 1.11 (1.01 - 1.22)             | 0.02     | 0.05     |
| Gender            |                                              |                     |                                |          |          |                                |          |          |
| Female            | 17.74<br>(16.10-19.50)                       | 13.53 (12.10-15.09) | 1.13 (0.97 - 1.30)             | 0.11     | 0.21     | 1.18 (1.02 - 1.35)             | 0.02     | 0.05     |
| Male              | 20.62<br>(19.08-22.25)                       | 14.32 (13.03-15.71) | 1.20 (1.06 - 1.36)             | 0.003    | 0.008    | 1.07 (0.95 - 1.21)             | 0.29     | 0.42     |
| Age group(years)  |                                              |                     |                                |          |          |                                |          |          |
| 45-64             | 5.46 (4.53-6.53)                             | 2.12 (1.56-2.83)    | 2.21(1.57 - 3.12)              | <0.001   | <0.001   | 1.40 (1.12 - 1.75)             | 0.004    | 0.01     |
| 65-74             | 20.00<br>(18.27-21.86)                       | 15.49 (13.95-17.14) | 1.13 (0.99 - 1.30)             | 0.07     | 0.13     | 1.09 (0.94 - 1.27)             | 0.25     | 0.41     |
| ≥75+              | 48.20<br>(44.01-52.68)                       | 38.36 (34.48-42.57) | 1.07 (0.93 - 1.24)             | 0.32     | 0.46     | 1.01 (0.88 - 1.15)             | 0.89     | 0.93     |

<sup>a</sup>Adjusted for sex, age, residence, insurance premium, coronary artery disease, chronic obstructive pulmonary disease, cerebrovascular disease, diabetes, chronic kidney disease, hypertension, hyperlipidemia, anxiety, depression, alcohol related illness, head injury, rheumatoid arthritis, asthma, length of hospital stay.

Abbreviation HR: hazard ratio; CI = confidence interval; FDR=False discovery rate HL= Hearing Loss.
